# Supplementary material for: Selective oxidation of dimethyl ether to methyl formate over trifunctional MoO3–SnO2 catalyst under mild conditions
Source: Royal Society of Chemistry journal article supplement (doi:10.1039/c3gc40279g), 2013-01-01
Supplement: c3gc40279g.pdf [file c3gc40279g.pdf]

# Selective oxidation of dimethyl ether to methyl formate over trifunctional MoO<sub>3</sub>-SnO<sub>2</sub> catalyst under mild conditions

Guangbo Liu,<sup>a,b</sup> Qingde Zhang,<sup>a</sup> Yizhuo Han,<sup>a</sup> Noritatsu Tsubaki<sup>a,c</sup> and Yisheng Tan<sup>a,\*</sup>

<sup>a</sup> State Key Laboratory of Coal Conversion, Institute of Coal Chemistry, Chinese Academy of Sciences, 27 South Taoyuan Road Taiyuan 030001, Shanxi, P. R. China Tel: +86 351 4044287; fax: +86 351 4044287. E-mail address: tan@sxicc.ac.cn (Y. Tan).

<sup>b</sup> University of Chinese Academy of Sciences, Beijing 100049, P. R. China

<sup>c</sup> Department of Applied Chemistry, School of Engineering, University of Toyama, Gofuku 3190, Toyama 930-8555, Japan.

## Experimental

### Catalyst Preparation

The MoO<sub>3</sub>-SnO<sub>2</sub> catalysts were prepared as follows: the obtained catalysts were referred to their Sn salt precursors: MoO<sub>3</sub>-SnO<sub>2</sub> (SnCl<sub>4</sub>), MoO<sub>3</sub>-SnO<sub>2</sub> (Na<sub>2</sub>SnO<sub>3</sub>) and MoO<sub>3</sub>-SnO<sub>2</sub> (SnCl<sub>2</sub>).

The MoO<sub>3</sub>-SnO<sub>2</sub> (SnCl<sub>4</sub>) catalyst was prepared as follows: co-precipitating Tin chloride (SnCl<sub>4</sub>·5H<sub>2</sub>O) aqueous solution and aqueous ammonia in drops at pH=8 at 333K. The obtained suspension was filtered and washed with deionized water until pH=7. Then the cake-like hydroxide was added to the required ammonium molybdate solution. After evaporation of the solvent in a rotary evaporator at 353K, the solid obtained was dried at 393K for 10h and annealed at 573K for 5h and then at 773K for 8h.

The MoO<sub>3</sub>-SnO<sub>2</sub> (SnCl<sub>2</sub>) catalyst was also prepared as above, but using SnCl<sub>2</sub> instead of SnCl<sub>4</sub>.

The MoO<sub>3</sub>-SnO<sub>2</sub> (Na<sub>2</sub>SnO<sub>3</sub>) catalysts were prepared as follows: co-precipitating sodium stannate aqueous solution (Na<sub>2</sub>SnO<sub>3</sub>·3H<sub>2</sub>O) and hydrochloric acid (HCl) in drops at pH=8. The obtained suspension was filtered and washed with deionized water until pH=7, and there was no precipitation when the AgNO<sub>3</sub> was added into the mother liquid. Then the cake-like hydroxide was added to the required ammonium molybdate solution. After evaporation of the solvent in a rotary evaporator at 353K, the solid obtained was dried at 393K for 10h and annealed at 573K for 5h and then at 773K for 8h.

### Catalytic Activity Tests

The reactions were carried out in a continuous flow type fixed-bed reactor containing catalyst (5ml, 20-40mesh) diluted with ground quartz. The catalyst was treated in a flow of O<sub>2</sub> (25ml/min) for 2h at 523K before reaction. The reactant mixture consisted of DME and O<sub>2</sub> with molar ratio of 1:1. The outlet stream line from the reactor to the gas chromatograph was heated at 423K. The hydrocarbon of reaction products were analyzed by gas chromatograph GC-9A (Shimadzu Co.) equipped with flame ionization detector (30m x 0.32mm, PEG-20M), and GC-4000A (Beijing Dongxi Co.) with thermal conductivity detector (Porapak T column). The GC-4000 (Beijing Dongxi Co.) equipped with thermal conductivity detector (TDX-01 column) was used to analyze H<sub>2</sub>, CO, CO<sub>2</sub> and CH<sub>4</sub>.

### Surface texture

The surface area and the particle size of the samples were measured by BET nitrogen adsorption isotherms at 77K using a Tristar 3000 machine.

### Temperature Programmed Desorption (TPD)

The NH<sub>3</sub>-TPD spectra were recorded in a fixed-bed reactor system equipped with a thermal

conductivity detector (TCD). The catalyst (100mg) was pretreated at 873K under Ar flow (40ml/min) for 2h and then cooled down to 373K under Ar flow. Then NH<sub>3</sub> was introduced into the flow system. After purging the residual NH<sub>3</sub> for 4h, the TPD spectra were recorded at a temperature rising rate of 5K/min from 373K to 873K.

The CO<sub>2</sub>-TPD spectra were recorded using the same instrument as the NH<sub>3</sub>-TPD. The catalyst (100mg) was pretreated at 873K under Ar flow (40ml/min) for 2h and then cooled down to 303K under Ar flow. Then CO<sub>2</sub> was introduced into the flow system. After purging the residual CO<sub>2</sub> for 4h, the TPD spectra were recorded at a temperature rising rate of 5K/min from 303K to 873K.

#### **NH<sub>3</sub> adsorption IR spectra**

Diffuse reflectance infrared spectra were measured by a Bruker Tensor 27 with a MCT detector (64 scans, 4 cm<sup>-1</sup>). The catalyst was placed in an in-situ IR cell equipped with KBr windows (Harrick). After heating at 673 K for 2 h and evacuating at 10<sup>-4</sup> bar, the cell was cooled down to room temperature and the spectrum was recorded. Next, the NH<sub>3</sub> gas was introduced into the cell, and after the equilibrium the sample was degassed. Finally, the spectra were recorded at 373K and the pressure of the cell was evacuated at 10<sup>-3</sup> bar.

#### **Temperature Programmed Reduction (TPR)**

H<sub>2</sub>-TPR was conducted in a fixed-bed reactor system equipped with a thermal conductivity detector. The sample (100mg) was pretreated in Ar at 973K for 2h and then cooled down to 303K. After that, a 10%H<sub>2</sub>/Ar mixture gas was switched on and the temperature was increased linearly at a rate of 5K/min from 303K to 973K.

#### **Raman Spectra**

Raman spectra were recorded on a Jobin-Yvon Labram-HR Confocal Laser Micro Raman spectrometer with an argon-ion laser at the excitation wavelength of 514.5nm and the resolution of 1cm<sup>-1</sup>. The Raman spectra were obtained in the range of 100-1100cm<sup>-1</sup> under ambient conditions.
